# Supplementary material for: Effects of a Follow-On Formula Containing Isomaltulose (Palatinose™) on Metabolic Response, Acceptance, Tolerance and Safety in Infants: A Randomized-Controlled Trial
Source: PubMed Central journal article supplement (PMC4795687; doi:10.1371/journal.pone.0151614), 2016-03-17
Supplement: pone.0151614.s005.pdf [file pone.0151614.s005.pdf]

**Amendment Nr. 1 to the study protocol<sup>1</sup> of the study**

***“Safety, acceptance and metabolic effects in infants receiving a novel low glycaemic index follow-on formula“ (“AMELIE” study)***

Following arrangements and protocol modifications have been agreed between investigators and the sponsor:

- Chapter 10 of the study protocol states: *“The participating families will receive financial compensation for their expenses...[.]. In addition, the infant will receive a commercial follow-on formula for additional 6 months to avoid the infants have to change their nutrition again. This follow-on formula will be the same formula like the control formula used in the study (commercial formula with high glycaemic carbohydrates).”* This provision is not possible and therefore no longer foreseen.

*We consent to the above research protocol changes and arrangements:*

Investigators:

Munich, 13.12.12

  
\_\_\_\_\_

Prof. Dr. Berthold Koletzko

(Principle investigator)

BENEO (sponsor):

Obrigheim, Nov 29<sup>th</sup> 2012

  
\_\_\_\_\_

Dr. Stephan Theis

  
\_\_\_\_\_

Carolin Sieland<sup>2</sup>

<sup>1</sup> Final study protocol version February 6th 2012 (Study\_Protocol\_AMELIE\_060212.doc)

<sup>2</sup> New contact person on behalf of sponsor replacing Ines Holub

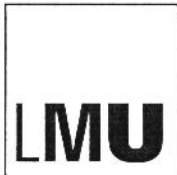

**KLINIKUM**  
DER UNIVERSITÄT MÜNCHEN

CAMPUS INNENSTADT

KINDERKLINIK UND KINDERPOLIKLINIK  
IM DR. V. HAUNERSCHEN KINDERSPITAL

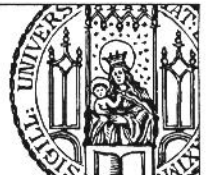

Klinikum der Universität München - Kinderklinik und Kinderpoliklinik im  
Dr. von Haunerschen Kinderspital, Lindwurmstr. 4, 80337 München

**Univ.-Prof. Dr. Berthold Koletzko**  
Sekretariat: Birgit Kessler  
Telefon +49 (0)89 5160 - 2826  
Telefax +49 (0)89 5160 - 7742  
office.koletzko@med.uni-muenchen.de

[www.klinikum.uni-muenchen.de](http://www.klinikum.uni-muenchen.de)

Postanschrift:  
Lindwurmstraße 4  
80337 München

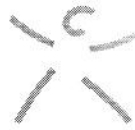

**Dr. von Haunersches**  
Kinderspital

Ihr Zeichen:

Unser Zeichen:

München, 04.03.2013

## **Amendment Nr. 2 to the study protocol of the study**

### ***„Safety, acceptance and metabolic effects in infants receiving a novel low glycaemic index follow-on formula“ (“AMELIE” study)***

Following arrangements and protocol modifications have been agreed between investigator and sponsor:

- The Inclusion criteria of Chapter 5.2 “Selection criteria” states:
  - weight between 10<sup>th</sup> and 90<sup>th</sup> percentile for age, according to the EURO Growth guidelines
    - ➔ Instead, weight between 5<sup>th</sup> and 95<sup>th</sup> percentile for age, according to the EURO Growth guidelines will be allowed. An influence on study outcome and estimated statistical power is not expected.
- The Inclusion criteria of Chapter 5.2 “Selection criteria” states:
  - fully formula fed for at least 4 weeks before intervention start
    - ➔ Instead, at least 2 weeks of full formula feeding before intervention start will be allowed. Thus, infants whose parents are interested in the study, but want their babies to be fully breastfed for 6 months, according to the guidelines of the WHO, can be included into the study within the given acceptable age range of the infants.

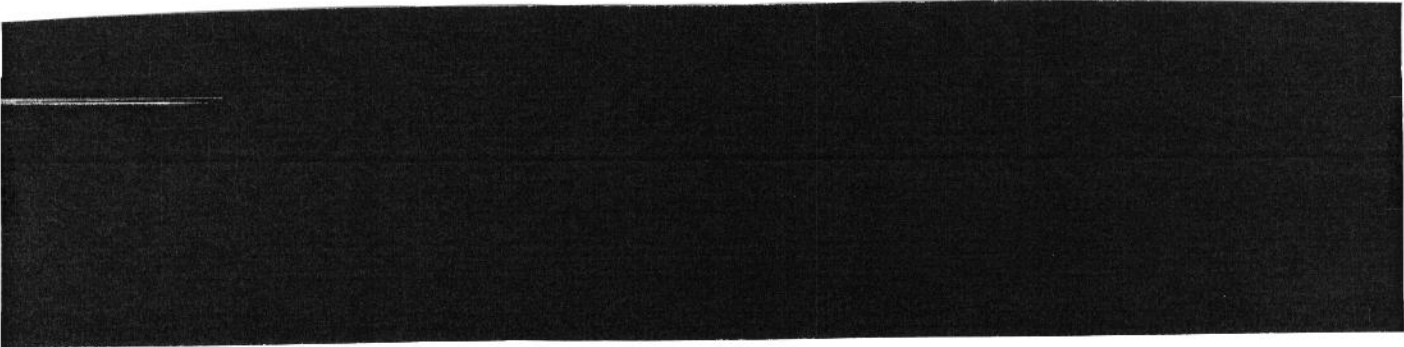

We consent to the above protocol changes:

Investigator:

Munich, 5.3.13 .....

  
\_\_\_\_\_

Prof. Dr. Berthold Koletzko  
(Principle investigator)

BENEEO (sponsor):

Obrigheim, 20.3.13 .....

  
\_\_\_\_\_

Dr. Stephan Theis

  
\_\_\_\_\_

Carolin Sieland

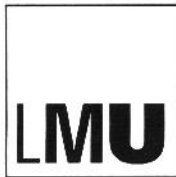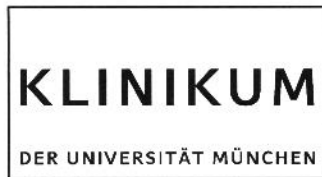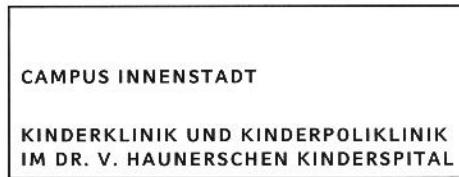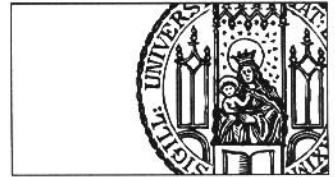

Klinikum der Universität München · Kinderklinik und Kinderpoliklinik im  
Dr. von Haunerschen Kinderspital, Lindwurmstr. 4, 80337 München

**Univ.-Prof. Dr. Berthold Koletzko**  
Sekretariat: Birgit Kessler  
Telefon +49 (0)89 5160 - 2826  
Telefax +49 (0)89 5160 - 7742  
office.koletzko@med.uni-muenchen.de

[www.klinikum.uni-muenchen.de](http://www.klinikum.uni-muenchen.de)

Postanschrift:  
Lindwurmstraße 4  
80337 München

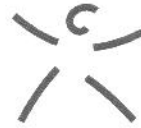

**Dr. von Haunersches  
Kinderspital**

Ihr Zeichen:

Unser Zeichen:

München, 18.06.2013

## **Amendment Nr. 3 to the study protocol of the study**

### ***„Safety, acceptance and metabolic effects in infants receiving a novel low glycaemic index follow-on formula“ (“AMELIE” study)***

Following arrangements and protocol modifications have been agreed between investigator and sponsor:

- The Inclusion criteria of Chapter 5.2 “Selection criteria” states:
  - age between 5 - 7th month of life at study entry
    - ➔ Instead, age between 5<sup>th</sup> and 9<sup>th</sup> month of age will be allowed. The common reference values of insulin and glucose do not differ in infants between 7 and 9 months. Thus, an influence on study outcome is not expected.
- The dietary regime of Chapter 7 “Study diet”.
  - One meal per day of complementary diet (pureed vegetable or potatoe-vegetable-meat) can feed in addition to study formula
    - ➔ Instead, the kind of complementary feeding, e.g. vegetable or fruits given to the infants can be chosen freely. But the amount of complementary feeding is restricted to a maximum 25% of

energy intake and to a maximum of 25% of carbohydrate intake. Furthermore, the infants are not allowed to have complementary feeding 6 hours before the final visit.

The introduction of complementary feeding according to the national recommendations may occur starting with vegetable-/vegetable-meat, followed by milk-cereal and then fruit-mush. With increasing study age, there will be more variance in kind and amount of complementary feeding. Similar to another study (Picaud et al. 2010), a maximum of 25% of other food than study formula is allowed. The energy and carbohydrate intakes via complementary feeding are calculated for each subject individually and are restricted to a maximum of 25% of total energy or carbohydrate intake.

Infants should not eat complementary feeding within a time interval of 6 hours before the final study visit to avoid any undue of a high carbohydrate intake e.g. from fruit mush on study outcome measures.

We consent to the above protocol changes:

Investigator:

Munich, 23.06.13



Prof. Dr. Berthold Koletzko  
(Principle investigator)

BENEO (sponsor):

Obrigheim, 01.07.13



Dr. Stephan Theis



Carolin Sieland
